# Supplementary material for: Assessment of Health Information Technology Interventions in Evidence-Based Medicine: A Systematic Review by Adopting a Methodological Evaluation Framework
Source: MDPI journal article supplement (doi:10.3390/healthcare6030109), 2018-08-31
Supplement: s1 [file s1]

# SF/HIT Framework

| SF/HIT Categories & Sub-categories |                 |                                                        | Description                            | Check                  |     |         |
|------------------------------------|-----------------|--------------------------------------------------------|----------------------------------------|------------------------|-----|---------|
| 1. Health Domain Category          | 1.0. General    | 1.0.1.Duration                                         | Years/months                           | Number of years/months |     |         |
|                                    |                 | 1.0.2, Population <sup>i</sup>                         | Characteristics/ Number                | Individuals            |     |         |
|                                    | 1.1. Design     | 1.1.1. Comparison (either RCT type) <sup>i</sup>       | Open label                             |                        |     |         |
|                                    |                 |                                                        | Single blind                           |                        |     |         |
|                                    |                 |                                                        | Double blind                           |                        |     |         |
|                                    |                 |                                                        | Not blinded                            |                        |     |         |
|                                    |                 |                                                        | Unclear                                |                        |     |         |
|                                    |                 | 1.1.2. Experimental Type                               | Prevention                             |                        |     |         |
|                                    |                 |                                                        | Screening                              |                        |     |         |
|                                    |                 |                                                        | Treatment                              |                        |     |         |
|                                    |                 |                                                        | Supportive care                        |                        |     |         |
|                                    |                 |                                                        | Health services research               |                        |     |         |
|                                    | 1.2. Annotation | 1.2.1. ICD-10 classification (Condition <sup>i</sup> ) | A00-B99                                |                        |     |         |
|                                    |                 |                                                        | .....                                  |                        |     |         |
|                                    |                 |                                                        | Z00-Z99                                |                        |     |         |
|                                    | 1.3. Evaluation | 1.3.1. PRISMA checklist <sup>ii</sup>                  |                                        |                        |     |         |
|                                    |                 | 1.3.2. CONSORT list <sup>iii</sup>                     |                                        |                        |     |         |
|                                    |                 | 1.3.2. Impact by type (Risk of bias items checklist)   |                                        | 1.3.3. Impact by rate  |     |         |
|                                    |                 |                                                        |                                        | High                   | Low | Unclear |
|                                    |                 |                                                        | Random sequence generation             |                        |     |         |
|                                    |                 |                                                        | Allocation concealment                 |                        |     |         |
|                                    |                 |                                                        | Blinding of participants and personnel |                        |     |         |
|                                    |                 |                                                        | Blinding of outcome assessment         |                        |     |         |
|                                    |                 |                                                        | Incomplete outcome data                |                        |     |         |
|                                    |                 |                                                        | Selective reporting                    |                        |     |         |
|                                    |                 |                                                        | Other bias                             |                        |     |         |

| SF/HIT Categories & Sub-categories        |                    |                                                                                                | Description                             | Check                 |                     |
|-------------------------------------------|--------------------|------------------------------------------------------------------------------------------------|-----------------------------------------|-----------------------|---------------------|
| 2. Health Information Technology Category | 2.1. Development   | 2.1.1. Category of applied Information science<br>(Taxonomy of HITs based on MeSH terminology) | L01.224.230.110                         |                       |                     |
|                                           |                    |                                                                                                | .....                                   |                       |                     |
|                                           |                    |                                                                                                | L01.313.500.750                         |                       |                     |
|                                           | 2.2. Functionality | 2.2.1. Functional capabilities of HITs                                                         | CBA                                     |                       |                     |
|                                           |                    |                                                                                                | CPOE                                    |                       |                     |
|                                           |                    |                                                                                                | DSS                                     |                       |                     |
|                                           |                    |                                                                                                | EHR                                     |                       |                     |
|                                           |                    |                                                                                                | Other                                   |                       |                     |
|                                           | 2.3. Evaluation    | 2.3.1. CONSORT-EHEALTH list <sup>iii</sup>                                                     |                                         |                       |                     |
|                                           |                    |                                                                                                |                                         |                       |                     |
|                                           |                    | 2.3.2. Impact by type (Outcomes <sup>i</sup> )                                                 |                                         | 2.3.3. Impact by rate |                     |
|                                           |                    |                                                                                                |                                         | Positive or Mixed     | Neutral or Negative |
|                                           |                    |                                                                                                | Preventive care                         |                       |                     |
|                                           |                    |                                                                                                | Adherence/Attendance                    |                       |                     |
|                                           |                    |                                                                                                | Efficiency                              |                       |                     |
|                                           |                    |                                                                                                | Perceived ease of use/Usefulness        |                       |                     |
|                                           |                    |                                                                                                | Effectiveness                           |                       |                     |
|                                           |                    |                                                                                                | Process of service delivery/Performance |                       |                     |
|                                           |                    |                                                                                                | Safety/Privacy/Security                 |                       |                     |
|                                           |                    |                                                                                                | Acceptability                           |                       |                     |
|                                           |                    |                                                                                                | Cost effectiveness                      |                       |                     |
|                                           |                    |                                                                                                | Appropriateness                         |                       |                     |
|                                           |                    |                                                                                                | Satisfaction                            |                       |                     |

<sup>i</sup> In accordance with the model PICO (Patients, Intervention, Comparison, Outcomes)

<sup>ii</sup> Only for systematic reviews

<sup>iii</sup> Only for RCTs
