# Supplementary material for: Assessment of Health Information Technology Interventions in Evidence-Based Medicine: A Systematic Review by Adopting a Methodological Evaluation Framework
Source: MDPI journal article supplement (doi:10.3390/healthcare6030109), 2018-08-31
Supplement: s1 [file s1]

**Table S1:** Health domain categorization

| Health Domain Category                                |                                                                  |                                                                                                                                                                                                                                                     |
|-------------------------------------------------------|------------------------------------------------------------------|-----------------------------------------------------------------------------------------------------------------------------------------------------------------------------------------------------------------------------------------------------|
| Sub-category                                          | Source (Reference)                                               | Elements                                                                                                                                                                                                                                            |
| 1. DESIGN                                             |                                                                  |                                                                                                                                                                                                                                                     |
| Review methodology                                    | PRISMA 2009 (Moher et al., 2009)                                 | A standard methodological tool for the design and assessment of RCTs in systematic reviews                                                                                                                                                          |
| Experimental Type (Primary purpose of RCT)            | (National Institute of Health, 2016, 2014)                       | [Pr]:Prevention                                                                                                                                                                                                                                     |
|                                                       |                                                                  | [Scr]: Screening                                                                                                                                                                                                                                    |
|                                                       |                                                                  | [Tr]:Treatment                                                                                                                                                                                                                                      |
|                                                       |                                                                  | [Sup]:Supportive care                                                                                                                                                                                                                               |
|                                                       |                                                                  | [Hsr]:Health services research                                                                                                                                                                                                                      |
|                                                       |                                                                  | [D]:Diagnostic                                                                                                                                                                                                                                      |
|                                                       |                                                                  | [Bs]:Basic Science                                                                                                                                                                                                                                  |
|                                                       |                                                                  | [Oth]:Other                                                                                                                                                                                                                                         |
| RCT type                                              | (National Institute of Health, 2014)                             | Open                                                                                                                                                                                                                                                |
|                                                       |                                                                  | Single blind                                                                                                                                                                                                                                        |
|                                                       |                                                                  | Double blind                                                                                                                                                                                                                                        |
|                                                       |                                                                  | Unclear                                                                                                                                                                                                                                             |
| 2. ANNOTATION                                         |                                                                  |                                                                                                                                                                                                                                                     |
| Classification of diseases                            | In accordance with the medical terminology ICD-10 (WHO, 2010)    | [A00-B99]:Certain infectious and parasitic diseases                                                                                                                                                                                                 |
|                                                       |                                                                  | [C00-D49]:Neoplasms                                                                                                                                                                                                                                 |
|                                                       |                                                                  | [E00-E89]:Endocrine, nutritional and metabolic diseases                                                                                                                                                                                             |
|                                                       |                                                                  | [F01-F99]:Mental, Behavioral and Neurodevelopmental disorders                                                                                                                                                                                       |
|                                                       |                                                                  | [I00-I99]:Diseases of the circulatory system                                                                                                                                                                                                        |
|                                                       |                                                                  | [J00-J99]:Diseases of the respiratory system, and                                                                                                                                                                                                   |
|                                                       |                                                                  | [Z00-Z99]:Factors influencing health status and contact with health services                                                                                                                                                                        |
|                                                       |                                                                  | Other subjects with the following sub-categories i.e., Older adults, Reproductive Health and Childbirth, Screening for Partner Violence etc.                                                                                                        |
| 3. EVALUATION                                         |                                                                  |                                                                                                                                                                                                                                                     |
| CONSORT statement and checklists                      | Trial evaluation based on (Begg et.al, 1996)                     | The CONSORT Statement comprises a 25-item checklist and a flow diagram. The checklist items focus on reporting how the trial was designed, analyzed, and interpreted; the flow diagram displays the progress of all participants through the trial. |
| Assessment of the quality of clinical trial by type   | Bias evaluation (Higgins and Green, 2011).                       | Random sequence generation (selection bias)                                                                                                                                                                                                         |
|                                                       |                                                                  | Allocation concealment (selection bias)                                                                                                                                                                                                             |
|                                                       |                                                                  | Blinding of participants and personnel (performance bias)                                                                                                                                                                                           |
|                                                       |                                                                  | Blinding of outcome assessment (detection bias)                                                                                                                                                                                                     |
|                                                       |                                                                  | Incomplete outcome data (attrition bias)                                                                                                                                                                                                            |
|                                                       |                                                                  | Selective reporting (reporting bias)                                                                                                                                                                                                                |
|                                                       |                                                                  | Other bias                                                                                                                                                                                                                                          |
| Assessment of the quality of clinical trial by rating | Cochrane Risk of Bias Assessment Tool (Higgins and Green, 2011). | High Level                                                                                                                                                                                                                                          |
|                                                       |                                                                  | Low Level                                                                                                                                                                                                                                           |
|                                                       |                                                                  | Uncertain                                                                                                                                                                                                                                           |

**Table S2: Health Information Technology categorization**

| Health Information Technology Category  |                                                                                                                                                                    |                                                                                                                                                                                                                     |
|-----------------------------------------|--------------------------------------------------------------------------------------------------------------------------------------------------------------------|---------------------------------------------------------------------------------------------------------------------------------------------------------------------------------------------------------------------|
| Sub-category                            | Source (Reference)                                                                                                                                                 | Elements (found in this study)                                                                                                                                                                                      |
| 1. DEVELOPMENT                          |                                                                                                                                                                    |                                                                                                                                                                                                                     |
| Category of applied Information science | Reviewers' assessment of the applied HITs using the <i>MeSH</i> classification system (U.S. National Library of Medicine, 1999).                                   | [L01.178.847.652]:Telemedicine (or Telehealth or eHealth))                                                                                                                                                          |
|                                         |                                                                                                                                                                    | [L01.178.847.698]:Telephone including Cell phones (smart phones and text messaging)                                                                                                                                 |
|                                         |                                                                                                                                                                    | [L01.313.500.750]:Medical Informatics Applications including: Decision Making, Computer-Assisted, Information systems, Community Networks, Computerized Medical Records Systems                                     |
|                                         |                                                                                                                                                                    | [L01.224.230.110]:Computer Communication Networks including Internet                                                                                                                                                |
|                                         |                                                                                                                                                                    | [L01.224.900.910]:User-Computer Interface (or Virtual Systems)                                                                                                                                                      |
| 2. FUNCTIONALITY                        |                                                                                                                                                                    |                                                                                                                                                                                                                     |
| Functional capabilities of HITs         | Reviewers' assessment based on (Clancy and Clancy, 1999), (Chaudhry et al., 2006), (Centers for Medicare & Medicaid Services (CMS), 2010) and (Jones et al., 2014) | [CBA]: Computer based alerts and reminders systems                                                                                                                                                                  |
|                                         |                                                                                                                                                                    | [CPOE]:Computerized Provider Order entry                                                                                                                                                                            |
|                                         |                                                                                                                                                                    | [DSS]:Decision Support Systems                                                                                                                                                                                      |
|                                         |                                                                                                                                                                    | [EHR]:Electronic Health Record based systems                                                                                                                                                                        |
|                                         |                                                                                                                                                                    | [OTHER]:Other or unable to classify technologies/systems                                                                                                                                                            |
| 3. EVALUATION                           |                                                                                                                                                                    |                                                                                                                                                                                                                     |
| Standard evaluation report              | CONSORT-EHEALTH Checklists (Eysenbach and CONSORT-EHEALTH Group, 2011)                                                                                             | A checklist for the design and assessment of <i>HITs</i> .<br><a href="https://www.jmir.org/ojs/public/journals/1/CONSORT-EHEALTH-v1-6.pdf">https://www.jmir.org/ojs/public/journals/1/CONSORT-EHEALTH-v1-6.pdf</a> |
| Dimension of impacts by type            | Reviewers' assessment about the type of outcomes based on (Buntin et al., 2011),                                                                                   | Preventive care                                                                                                                                                                                                     |
|                                         |                                                                                                                                                                    | Adherence/ Attendance                                                                                                                                                                                               |
|                                         |                                                                                                                                                                    | Efficiency                                                                                                                                                                                                          |
|                                         |                                                                                                                                                                    | Perceived ease of use/Usefulness                                                                                                                                                                                    |
|                                         |                                                                                                                                                                    | Effectiveness                                                                                                                                                                                                       |
|                                         |                                                                                                                                                                    | Process of service delivery                                                                                                                                                                                         |
|                                         |                                                                                                                                                                    | Safety/Privacy/Security                                                                                                                                                                                             |
|                                         |                                                                                                                                                                    | Acceptability                                                                                                                                                                                                       |
|                                         |                                                                                                                                                                    | Cost effectiveness                                                                                                                                                                                                  |
|                                         |                                                                                                                                                                    | Appropriateness                                                                                                                                                                                                     |
| Dimension of impacts by rating          | Reviewers' assessment about the type of outcomes based on (Buntin et al., 2011)                                                                                    | Positive or mixed-positive                                                                                                                                                                                          |
|                                         |                                                                                                                                                                    | Neutral or Not clear or Negative                                                                                                                                                                                    |

**Table S3:** Studies/trials in respect to *RCT* type, Experimental type, functional capabilities of *HITs* and Categories of applied Information science

✓ This article holds the characteristic of the specific column

» This article refers to the same trial as the one mentioned in the article above

| Studies                                                                             | Duration (Year(s)) | Registration (Year) | RCT type   |              |              |             |         | Population | Experimental Type |           |           |                 |                          | Functional capabilities of<br>HITs |      |     |     |       | Category of applied<br>Information science |                 |                 |                 |                 |
|-------------------------------------------------------------------------------------|--------------------|---------------------|------------|--------------|--------------|-------------|---------|------------|-------------------|-----------|-----------|-----------------|--------------------------|------------------------------------|------|-----|-----|-------|--------------------------------------------|-----------------|-----------------|-----------------|-----------------|
|                                                                                     |                    |                     | Open Label | Single blind | Double blind | Not blinded | Unclear |            | Prevention        | Screening | Treatment | Supportive care | Health services research | CBA                                | CPOE | DSS | EHR | Other | L01.224.230.110                            | L01.178.847.652 | L01.178.847.698 | L01.224.900.910 | L01.313.500.750 |
| A00-B99: Certain infectious and parasitic diseases Infections (5 studies /5 trials) |                    |                     |            |              |              |             |         |            |                   |           |           |                 |                          |                                    |      |     |     |       |                                            |                 |                 |                 |                 |
| (Stein et al., 2011)                                                                | 1                  | 2010                |            |              | ✓            |             |         | 400        |                   |           |           |                 | ✓                        |                                    |      |     |     | ✓     |                                            |                 |                 |                 | ✓               |
| (Pop-Eleches et al., 2011)                                                          | 1                  | 2010                | ✓          |              |              |             |         | 720        |                   |           |           | ✓               |                          | ✓                                  |      |     |     |       |                                            |                 | ✓               |                 |                 |
| (Bigna et al., 2014)                                                                | 1                  | 2013                |            |              | ✓            |             |         | 224        |                   |           | ✓         |                 |                          | ✓                                  |      |     |     |       |                                            |                 | ✓               |                 |                 |
| (Mbuagbaw et al., 2013)                                                             | 3                  | 2010                |            |              | ✓            |             |         | 198        |                   |           | ✓         |                 |                          | ✓                                  |      |     |     |       |                                            |                 | ✓               |                 |                 |
| (Ybarra et al., 2015)                                                               | 6                  | 2009                | ✓          |              |              |             |         | 374        | ✓                 |           |           |                 |                          |                                    |      |     |     | ✓     | ✓                                          |                 |                 |                 |                 |
| Avg of duration/Total                                                               | 2.4                | -                   | 2          | 0            | 3            | 0           | 0       | 1916       | 1                 | 0         | 2         | 1               | 1                        | 3                                  | 0    | 0   | 0   | 2     | 1                                          | 0               | 3               | 0               | 1               |
| C00-D49: Neoplasms (4 studies /4 trials)                                            |                    |                     |            |              |              |             |         |            |                   |           |           |                 |                          |                                    |      |     |     |       |                                            |                 |                 |                 |                 |
| (Miller Jr et al., 2011)                                                            | 4                  | 2007                |            | ✓            |              |             |         | 350        |                   |           |           |                 | ✓                        | ✓                                  |      |     |     |       | ✓                                          |                 |                 |                 |                 |
| (Meropol et al., 2013)                                                              | 8                  | 2005                |            |              |              |             | ✓       | 720        |                   |           | ✓         |                 |                          |                                    |      | ✓   |     |       | ✓                                          |                 |                 |                 |                 |
| (Lana et al., 2014)                                                                 | 5                  | 2009                |            |              |              |             | ✓       | 3000       | ✓                 |           |           |                 |                          | ✓                                  |      |     |     |       | ✓                                          |                 |                 |                 |                 |
| (Kearney et al., 2009)                                                              | 4                  | 2005                |            |              |              |             | ✓       | 150        |                   | ✓         |           |                 |                          | ✓                                  |      |     |     |       |                                            |                 | ✓               |                 |                 |
| Avg of duration/Total                                                               | 5.25               | -                   | 0          | 1            | 0            | 0           | 3       | 4220       | 1                 | 1         | 1         | 0               | 1                        | 3                                  | 0    | 1   | 0   | 0     | 3                                          | 0               | 1               | 0               | 0               |

| E00-E89: Endocrine, nutritional and metabolic diseases (7 studies /7 trials)         |      |      |    |   |   |   |   |       |   |   |    |   |   |   |   |   |   |    |    |   |   |   |   |
|--------------------------------------------------------------------------------------|------|------|----|---|---|---|---|-------|---|---|----|---|---|---|---|---|---|----|----|---|---|---|---|
| (van Wyk et al., 2008)                                                               | 2    | 2006 | ✓  |   |   |   |   | 88001 |   |   | ✓  |   |   | ✓ |   | ✓ | ✓ |    |    |   |   | ✓ |   |
| (Arora et al., 2012)                                                                 | 1    | 2011 | ✓  |   |   |   |   | 200   |   |   |    |   | ✓ | ✓ |   |   |   |    |    | ✓ |   |   |   |
| (Goodarzi et al., 2012)                                                              | 1    | 2011 |    |   |   | ✓ |   | 100   |   |   | ✓  |   |   | ✓ |   |   |   |    |    | ✓ |   |   |   |
| (Ramirez et al., 2016)                                                               | 3    | 2013 | ✓  |   |   |   |   | 1485  |   | ✓ |    |   |   |   |   | ✓ |   |    |    | ✓ |   |   |   |
| (Buckingham et al., 2015)                                                            | 2    | 2013 | ✓  |   |   |   |   | 120   | ✓ |   |    |   |   |   |   | ✓ |   |    |    |   |   | ✓ |   |
| (Bartholomew et al., 2015)                                                           | 2    | 2013 | ✓  |   |   |   |   | 100   |   |   | ✓  |   |   |   |   |   |   | ✓  | ✓  | ✓ | ✓ |   |   |
| (Kropff et al., 2015)                                                                | 1    | 2014 | ✓  |   |   |   |   | 36    |   |   | ✓  |   |   | ✓ |   |   |   |    |    |   |   | ✓ |   |
| Avg of duration/Total                                                                | 1.71 | -    | 6  | 0 | 0 | 1 | 0 | 90042 | 1 | 1 | 4  | 0 | 1 | 4 | 0 | 3 | 0 | 1  | 1  | 1 | 4 | 0 | 3 |
| F01-F99: Mental, Behavioral and Neurodevelopmental disorders (18 studies /18 trials) |      |      |    |   |   |   |   |       |   |   |    |   |   |   |   |   |   |    |    |   |   |   |   |
| (Rindal et al., 2013)                                                                | 1    | 2012 | ✓  |   |   |   |   | 548   |   |   |    |   | ✓ |   |   | ✓ | ✓ |    |    |   |   | ✓ |   |
| (Espeland et al., 2013)<br>(2 trials)                                                | 5    | 2008 |    | ✓ |   |   |   | 100   | ✓ |   |    |   |   |   |   |   |   | ✓  |    |   |   | ✓ |   |
|                                                                                      | 3    | 2010 |    | ✓ |   |   |   | 1600  | ✓ |   |    |   |   |   |   |   |   | ✓  |    |   |   | ✓ |   |
| (Garrido et al., 2013)                                                               | 1    | 2012 |    | ✓ |   |   |   | 135   |   |   | ✓  |   |   |   |   |   |   | ✓  |    |   |   | ✓ |   |
| (Tamblyn et al., 2012)                                                               | 3    | 2009 |    | ✓ |   |   |   | 4800  |   |   | ✓  |   |   | ✓ |   |   | ✓ |    |    |   |   | ✓ |   |
| (Kay-Lambkin et al., 2011)                                                           | 4    | 2007 |    |   | ✓ |   |   | 100   |   |   | ✓  |   |   |   |   |   |   | ✓  |    |   |   | ✓ |   |
| (Linder et al., 2009)                                                                | 3    | 2006 |    |   |   |   | ✓ | 4314  |   |   | ✓  |   |   | ✓ |   |   | ✓ |    |    |   |   | ✓ |   |
| (Van Voorhees et al., 2013)                                                          | 4    | 2009 |    | ✓ |   |   |   | 110   |   |   |    | ✓ |   |   |   |   |   | ✓  | ✓  |   |   |   |   |
| (Hedman et al., 2011)                                                                | 2    | 2009 | ✓  |   |   |   |   | 80    |   |   | ✓  |   |   |   |   |   |   | ✓  | ✓  |   |   |   |   |
| (Hedman et al., 2013)                                                                | 4    | >>   | >> |   |   |   |   | >>    |   |   | >> |   |   |   |   |   |   | >> | >> |   |   |   |   |
| (Proudfoot et al., 2013)                                                             | 3    | 2010 |    |   | ✓ |   |   | 2000  |   |   |    | ✓ |   | ✓ |   |   |   |    | ✓  | ✓ | ✓ |   |   |
| (Whittaker et al., 2011)                                                             | 5    | 2006 |    |   | ✓ |   |   | 1300  |   |   | ✓  |   |   | ✓ |   |   |   |    |    |   | ✓ |   |   |
| (Whittaker et al., 2012)                                                             | 2    | 2009 |    |   | ✓ |   |   | 790   | ✓ |   |    |   |   | ✓ |   |   |   |    |    |   | ✓ |   |   |
| (Gajecki et al., 2014)                                                               | 0    | 2013 |    | ✓ |   |   |   | 4408  |   |   | ✓  |   |   | ✓ |   |   |   |    |    | ✓ | ✓ |   |   |
| (Reid et al., 2011)                                                                  | 3    | 2008 |    |   | ✓ |   |   | 200   | ✓ |   |    |   |   |   |   |   |   | ✓  |    |   | ✓ |   |   |
| (Crombie et al., 2013)                                                               | 3    | 2010 |    |   |   |   | ✓ | 50    |   |   | ✓  |   |   | ✓ |   |   |   |    |    |   | ✓ |   |   |
| (Watts et al., 2013)                                                                 | 2    | 2011 | ✓  |   |   |   |   | 126   |   |   | ✓  |   |   | ✓ |   |   |   | ✓  |    |   | ✓ |   |   |
| (Tulbure et al., 2015)                                                               | 3    | 2012 | ✓  |   |   |   |   | 96    |   |   | ✓  |   |   |   |   |   |   | ✓  | ✓  |   |   |   |   |
| (McClure et al., 2016)                                                               | 2    | 2014 |    |   | ✓ |   |   | 70    |   |   | ✓  |   |   | ✓ |   |   |   |    |    |   | ✓ |   |   |
| Avg of duration/Total                                                                | 2.72 | -    | 4  | 6 | 6 | 0 | 2 | 20827 | 4 | 0 | 11 | 2 | 1 | 8 | 1 | 1 | 3 | 9  | 4  | 2 | 8 | 0 | 7 |

|                                                                                                   |      |      |   |   |   |   |   |      |   |   |   |   |   |   |   |   |   |   |   |   |   |   |   |
|---------------------------------------------------------------------------------------------------|------|------|---|---|---|---|---|------|---|---|---|---|---|---|---|---|---|---|---|---|---|---|---|
| I00-I99: Diseases of the circulatory system (6 studies /5 trials)                                 |      |      |   |   |   |   |   |      |   |   |   |   |   |   |   |   |   |   |   |   |   |   |   |
| (Pfaeffli et al., 2012)                                                                           | 2    | 2010 |   |   | ✓ |   |   | 170  |   |   |   | ✓ |   | ✓ |   |   |   | ✓ |   | ✓ |   |   |   |
| (Antypas and Wangberg, 2014)                                                                      | 4    | 2010 |   |   | ✓ |   |   | 255  |   |   |   | ✓ |   | ✓ |   |   |   | ✓ |   | ✓ |   |   |   |
| (Stoddart et al., 2013)                                                                           | 5    | 2008 |   |   |   |   | ✓ | 400  |   | ✓ |   |   |   | ✓ |   | ✓ |   |   | ✓ |   |   |   |   |
| (McKinstry et al., 2013)                                                                          | »    | »    |   |   |   |   | » | »    |   | » |   |   |   | » |   | » |   |   | » |   |   |   |   |
| (Fjeldsoe et al., 2012)                                                                           | 1    | 2011 |   |   |   |   | ✓ | 400  |   |   |   | ✓ |   | ✓ |   |   |   | ✓ |   | ✓ | ✓ |   |   |
| (Kizony et al., 2013)                                                                             | 1    | 2012 |   | ✓ |   |   |   | 24   |   |   | ✓ |   |   |   |   |   |   | ✓ |   | ✓ |   |   |   |
| Avg of duration/Total                                                                             | 2.60 | -    | 0 | 1 | 2 | 0 | 2 | 1249 | 0 | 1 | 1 | 3 | 0 | 4 | 0 | 1 | 0 | 1 | 3 | 2 | 3 | 1 | 0 |
| J00-J99: Diseases of the respiratory system (3 studies /2 trials)                                 |      |      |   |   |   |   |   |      |   |   |   |   |   |   |   |   |   |   |   |   |   |   |   |
| (Ryan et al., 2012)                                                                               | 5    | 2007 |   | ✓ |   |   |   | 312  |   |   |   | ✓ |   |   |   |   |   | ✓ |   | ✓ |   |   |   |
| (Malhotra et al., 2012)                                                                           | »    | »    |   | » |   |   |   | »    |   |   |   | » |   |   |   |   |   | » |   | » |   |   |   |
| (Meltzer, Kelley and Hovell, 2008)                                                                | 2    | 2006 | ✓ |   |   |   |   | 12   |   |   | ✓ |   |   | ✓ |   |   |   | ✓ |   |   | ✓ |   |   |
| Avg of duration/Total                                                                             | 3.50 | -    | 1 | 1 | 0 | 0 | 0 | 324  | 0 | 0 | 1 | 1 | 0 | 1 | 0 | 0 | 0 | 2 | 0 | 1 | 1 | 0 | 0 |
| Z00-Z99: Factors influencing health status and contact with health services (8 studies /7 trials) |      |      |   |   |   |   |   |      |   |   |   |   |   |   |   |   |   |   |   |   |   |   |   |
| (Suhling et al., 2014)                                                                            | 3    | 2011 | ✓ |   |   |   |   | 62   |   |   |   | ✓ |   |   |   |   |   | ✓ |   |   |   |   | ✓ |
| (Turner-McGrievy and Tate, 2011)                                                                  | 1    | 2010 | ✓ |   |   |   |   | 104  |   |   | ✓ |   |   | ✓ |   |   |   |   | ✓ |   | ✓ | ✓ |   |
| (Turner-McGrievy and Tate, 2013)                                                                  | 3    | »    | » |   |   |   |   | »    |   |   | » |   |   | » |   |   |   |   | » |   | » | » |   |
| (Short et al., 2014)                                                                              | 3    | 2011 |   |   | ✓ |   |   | 504  |   |   |   |   | ✓ | ✓ |   |   |   |   | ✓ |   | ✓ |   |   |
| (Batch et al., 2014)                                                                              | 4    | 2010 |   |   | ✓ |   |   | 300  |   |   | ✓ |   |   | ✓ |   |   |   |   |   |   | ✓ |   |   |
| (Norman et al., 2013)                                                                             | 6    | 2007 | ✓ |   |   |   |   | 60   |   |   | ✓ |   |   |   |   |   |   |   |   |   | ✓ |   |   |
| (Albrecht et al., 2013)                                                                           | 0    | 2013 |   | ✓ |   |   |   | 10   |   |   |   |   | ✓ |   |   |   |   | ✓ |   |   | ✓ |   |   |
| (King et al., 2013)                                                                               | 3    | 2010 |   | ✓ |   |   |   | 40   | ✓ |   |   |   |   | ✓ |   |   |   |   |   |   |   | ✓ |   |
| Avg of duration/Total                                                                             | 2.86 | -    | 3 | 1 | 2 | 0 | 0 | 1040 | 0 | 0 | 3 | 1 | 2 | 3 | 0 | 0 | 0 | 2 | 2 | 0 | 5 | 1 | 1 |

| Other subjects (Older adults, Reproductive Health and Childbirth, Screening for Partner Violence) (4 studies /3 trials) |      |      |       |       |        |       |       |      |       |      |       |       |       |       |      |       |      |       |       |       |       |       |       |
|-------------------------------------------------------------------------------------------------------------------------|------|------|-------|-------|--------|-------|-------|------|-------|------|-------|-------|-------|-------|------|-------|------|-------|-------|-------|-------|-------|-------|
| (Ahmad et al., 2009)                                                                                                    | 4    | 2005 | √     |       |        |       |       | 280  |       | √    |       |       |       |       |      |       | √    |       |       |       |       | √     |       |
| (Terrell et al., 2009)                                                                                                  | 3    | 2006 |       |       | √      |       |       | 954  |       |      | √     |       |       | √     |      |       |      |       |       |       |       | √     |       |
| (Lund et al., 2014a)                                                                                                    | 1    | 2013 | √     |       |        |       |       | 2550 |       |      |       |       | √     |       |      |       | √    |       |       | √     |       |       |       |
| (Lund et al., 2014b)                                                                                                    | »    | »    | »     |       |        |       |       | »    |       |      |       |       | »     |       |      |       | »    |       |       |       |       |       |       |
| Avg of duration/Total                                                                                                   | 2.67 | -    | 2     | 0     | 1      | 0     | 0     | 3784 | 0     | 1    | 1     | 0     | 1     | 0     | 1    | 0     | 0    | 2     | 0     | 0     | 1     | 0     | 2     |
| Number of trials                                                                                                        | -    | -    | 18    | 11    | 14     | 1     | 7     | -    | 8     | 4    | 24    | 8     | 7     | 27    | 2    | 6     | 4    | 19    | 14    | 6     | 26    | 3     | 14    |
| Number of trials with positive outcome summary                                                                          |      |      | 12    | 7     | 8      | 1     | 3     |      | 6     | 4    | 14    | 2     | 5     | 14    | 1    | 6     | 2    | 13    | 9     | 4     | 13    | 1     | 9     |
| Percentage of total                                                                                                     | -    | -    | 35.3% | 21.6% | 27.5%  | 2.0%  | 13.7% |      | 15.7% | 7.8% | 47.1% | 15.7% | 13.7% | 52.9% | 3.9% | 11.8% | 7.8% | 37.3% | 27.5% | 11.8% | 51.0% | 5.9%  | 27.5% |
| Percentage with positive outcome summary                                                                                |      |      | 66.7% | 63.6% | 57.1 % | 100 % | 42.9% |      | 75%   | 100% | 58.3% | 25%   | 71.4% | 51.9% | 50%  | 100%  | 50%  | 68.4% | 64.3% | 66.7% | 50%   | 33.3% | 64.3% |
| Summary of trials:                                                                                                      |      |      |       |       |        |       |       |      |       |      |       |       |       |       |      |       |      |       |       |       | 51    |       |       |

**Table S4:** Primary outcomes and several dimensions of study/trial impacts by type and rating

- ✓ This article holds the characteristic of the specific column
- » This article refers to the same trial as the one mentioned in the article above
- + The use of *HITs* has *Positive* or *Mixed* (at least one positive and one neutral or negative) influence on the results (impacts)
- The use of *HITs* has *Neutral* or *Negative* influence on the results (impacts)

| Studies                                                                             | Measures of the primary outcomes                             | Impact by type  |                      |            |                                  |               |                                          |                         |               |                    |                 |              | Outcome summary (Total estimation for the trial) |
|-------------------------------------------------------------------------------------|--------------------------------------------------------------|-----------------|----------------------|------------|----------------------------------|---------------|------------------------------------------|-------------------------|---------------|--------------------|-----------------|--------------|--------------------------------------------------|
|                                                                                     |                                                              | Preventive care | Adherence/Attendance | Efficiency | Perceived ease of use/Usefulness | Effectiveness | Process of service delivery/ Performance | Safety/Privacy/Security | Acceptability | Cost effectiveness | Appropriateness | Satisfaction |                                                  |
| A00-B99: Certain infectious and parasitic diseases Infections (5 studies /5 trials) |                                                              |                 |                      |            |                                  |               |                                          |                         |               |                    |                 |              |                                                  |
| (Stein et al., 2011)                                                                | The proportion of subjects with treatment failure or relapse |                 |                      |            |                                  | ✓             | ✓                                        | ✓                       | ✓             |                    | ✓               |              | --                                               |
| (Pop-Eleches et al., 2011)                                                          | MEMS Adherence                                               |                 | ✓                    |            |                                  |               |                                          |                         |               |                    |                 |              | --                                               |
| (Bigna et al., 2014)                                                                | Efficacy; Efficiency                                         |                 |                      | ✓          |                                  | ✓             |                                          |                         |               | ✓                  |                 |              | --                                               |
| (Mbuagbaw et al., 2013)                                                             | Adherence                                                    |                 | ✓                    | ✓          |                                  | ✓             |                                          |                         |               | ✓                  |                 | ✓            | --                                               |
| (Ybarra et al., 2015)                                                               | The frequency of unprotected sex                             | ✓               |                      |            |                                  |               |                                          |                         |               |                    |                 |              | +                                                |
| Total of this category                                                              |                                                              | 1               | 2                    | 2          | 0                                | 3             | 1                                        | 1                       | 1             | 2                  | 1               | 1            | 1 +                                              |

| <b>C00-D49: Neoplasms (4 studies /4 trials)</b>                                     |                                                                                                                                                                                                                                                                                                                                                                                                                             |          |          |          |          |          |          |          |          |          |          |          |            |
|-------------------------------------------------------------------------------------|-----------------------------------------------------------------------------------------------------------------------------------------------------------------------------------------------------------------------------------------------------------------------------------------------------------------------------------------------------------------------------------------------------------------------------|----------|----------|----------|----------|----------|----------|----------|----------|----------|----------|----------|------------|
| (Miller Jr et al., 2011)                                                            | Receipt of colorectal cancer screening                                                                                                                                                                                                                                                                                                                                                                                      |          | ✓        |          |          | ✓        |          |          |          |          |          |          | +          |
| (Meropol et al., 2013)                                                              | Assess content of consultation by applying a coding scheme to transcripts and design yes/no questions; Satisfaction with patient-physician communication by Medical Interview Satisfaction Survey and Face Valid Survey; Assess decisional conflict by Decisional Conflict Scale; Expectations regarding potential benefits and adverse reactions associated with treatment options by Treatment Options Expectations Scale |          |          |          |          | ✓        |          |          |          |          |          | ✓        | +          |
| (Lana et al., 2014)                                                                 | Global cancer behavioral risk indicator                                                                                                                                                                                                                                                                                                                                                                                     | ✓        |          |          |          | ✓        |          |          |          |          |          |          | --         |
| (Kearney et al., 2009)                                                              | Changes in chemotherapy toxicity as a result of use of the mobile phone system and supporting information technology (IT) infrastructure                                                                                                                                                                                                                                                                                    |          |          |          |          | ✓        |          |          |          |          |          |          | +          |
| <b>Total of this category</b>                                                       |                                                                                                                                                                                                                                                                                                                                                                                                                             | <b>1</b> | <b>1</b> | <b>0</b> | <b>0</b> | <b>3</b> | <b>0</b> | <b>0</b> | <b>0</b> | <b>0</b> | <b>0</b> | <b>1</b> | <b>3 +</b> |
| <b>E00-E89: Endocrine, nutritional and metabolic diseases (7 studies /7 trials)</b> |                                                                                                                                                                                                                                                                                                                                                                                                                             |          |          |          |          |          |          |          |          |          |          |          |            |
| (van Wyk et al., 2008)                                                              | The percentage of correctly screened patients using anonymous patient record data; The percentage of correctly treated patients using anonymous patient record data.                                                                                                                                                                                                                                                        |          |          |          |          | ✓        | ✓        |          |          |          |          |          | +          |
| (Arora et al., 2012)                                                                | Hemoglobin A1C at 6 months                                                                                                                                                                                                                                                                                                                                                                                                  |          |          |          |          | ✓        | ✓        |          |          |          |          |          | +          |
| (Goodarzi et al., 2012)                                                             | HgA1C;Attitude;Blood lipids; Fasting Blood Sugar; Knowledge; Practice; Self-efficacy                                                                                                                                                                                                                                                                                                                                        |          |          |          |          | ✓        |          |          |          |          |          |          | +          |
| (Ramirez et al., 2016)                                                              | Change from baseline in depression outcome at 6-months                                                                                                                                                                                                                                                                                                                                                                      |          |          |          | ✓        | ✓        |          | ✓        | ✓        |          |          |          | +          |
| (Buckingham et al., 2015)                                                           | Comparison of intervention nights and control nights in which hypoglycemia occurred                                                                                                                                                                                                                                                                                                                                         | ✓        |          |          |          | ✓        |          |          |          |          |          |          | +          |
| (Bartholomew et al., 2015)                                                          | Compliance with home blood glucose reporting                                                                                                                                                                                                                                                                                                                                                                                |          |          |          | ✓        | ✓        |          |          |          |          |          | ✓        | +          |
| (Kropff et al., 2015)                                                               | Percent time spent in target range (3.9-10.0 mmol/L or 70-180 mg/dL) during each study period                                                                                                                                                                                                                                                                                                                               |          |          |          |          | ✓        |          | ✓        | ✓        |          |          |          | +          |
| <b>Total of this category</b>                                                       |                                                                                                                                                                                                                                                                                                                                                                                                                             | <b>1</b> | <b>0</b> | <b>0</b> | <b>2</b> | <b>7</b> | <b>2</b> | <b>2</b> | <b>2</b> | <b>0</b> | <b>0</b> | <b>1</b> | <b>7 +</b> |



**F01-F99: Mental, Behavioral and Neurodevelopmental disorders (18 studies /18 trials)**

|                                       |                                                                                                                                                                                                                                            |   |   |  |   |    |   |  |   |  |  |  |    |
|---------------------------------------|--------------------------------------------------------------------------------------------------------------------------------------------------------------------------------------------------------------------------------------------|---|---|--|---|----|---|--|---|--|--|--|----|
| (Rindal et al., 2013)                 | Patient report of dental providers delivery of: Screening for tobacco Discussion of specific strategies to assist the patient with quitting smoking Referral to a Quit line (toll free number for comprehensive tobacco cessation support) |   |   |  |   | ✓  | ✓ |  |   |  |  |  | +  |
| (Espeland et al., 2013)<br>(2 trials) | Composite of six executive functioning and four episodic memory measures that have been previously validated.<br>Major mobility disability, defined as incapacity to walk 400 m.                                                           | ✓ |   |  |   | ✓  |   |  | ✓ |  |  |  | -- |
|                                       |                                                                                                                                                                                                                                            |   |   |  |   |    |   |  |   |  |  |  | +  |
| (Garrido et al., 2013)                | Change in neurocognitive outcomes                                                                                                                                                                                                          |   |   |  |   | ✓  |   |  |   |  |  |  | +  |
| (Tamblyn et al., 2012)                | Rate of potentially inappropriate psychotropic medication                                                                                                                                                                                  |   |   |  |   | ✓  |   |  |   |  |  |  | -- |
| (Kay-Lambkin et al., 2011)            | Reduction in depression scores as measured by the Beck Depression Inventory II                                                                                                                                                             |   | ✓ |  |   | ✓  |   |  | ✓ |  |  |  | +  |
| (Linder et al., 2009)                 | The proportion of documented smokers who made contact with a smoking cessation counselor.                                                                                                                                                  |   |   |  |   | ✓  |   |  |   |  |  |  | -- |
| (Van Voorhees et al., 2013)           | Percentage visiting the Internet site                                                                                                                                                                                                      |   | ✓ |  |   |    |   |  |   |  |  |  | +  |
| (Hedman et al., 2011)                 | Health Anxiety Inventory                                                                                                                                                                                                                   |   |   |  |   | ✓  |   |  |   |  |  |  | +  |
| (Hedman et al., 2013)                 | >>                                                                                                                                                                                                                                         |   |   |  |   | >> |   |  | ✓ |  |  |  | >> |
| (Proudfoot et al., 2013)              | Mean Depression Anxiety Stress Scales (DASS) score                                                                                                                                                                                         |   |   |  |   | ✓  |   |  |   |  |  |  | +  |
| (Whittaker et al., 2011)              | Continuous abstinence                                                                                                                                                                                                                      |   |   |  | ✓ | ✓  | ✓ |  |   |  |  |  | -- |
| (Whittaker et al., 2012)              | Change in depressive symptoms as measured by the Child Depression Rating Scale-Revised (CDRS-R)                                                                                                                                            | ✓ |   |  |   | ✓  |   |  | ✓ |  |  |  | +  |
| (Gajecki et al., 2014)                | Alcohol Use Disorders Identification Test (AUDIT);Change in estimated Blood Alcohol Concentration (eBAC)                                                                                                                                   |   |   |  |   | ✓  |   |  |   |  |  |  | -- |
| (Reid et al., 2011)                   | Depressive symptoms                                                                                                                                                                                                                        | ✓ |   |  |   | ✓  |   |  |   |  |  |  | +  |
| (Crombie et al.,                      | The change in frequency of heavy drinking                                                                                                                                                                                                  |   |   |  |   | ✓  |   |  |   |  |  |  | -- |

|                                                                                 |                                                                                                  |          |          |          |          |           |          |          |          |          |          |          |             |
|---------------------------------------------------------------------------------|--------------------------------------------------------------------------------------------------|----------|----------|----------|----------|-----------|----------|----------|----------|----------|----------|----------|-------------|
| 2013)                                                                           |                                                                                                  |          |          |          |          |           |          |          |          |          |          |          |             |
| (Watts et al., 2013)                                                            | Patient Health Questionnaire-9 (PHQ-9) which is a 9 item depression scale.                       |          |          |          |          | ✓         |          |          |          |          |          |          | +           |
| (Tulbure et al., 2015)                                                          | Leibowitz Social Anxiety Scale - Self Report (LSAS-SR); Social Phobia Inventory (SPIN)           |          | ✓        |          |          | ✓         |          |          |          |          |          | ✓        | +           |
| (McClure et al., 2016)                                                          | Point prevalence abstinence                                                                      |          | ✓        |          |          | ✓         |          |          | ✓        |          |          |          | +           |
| <b>Total of this category</b>                                                   |                                                                                                  | <b>3</b> | <b>4</b> | <b>0</b> | <b>1</b> | <b>16</b> | <b>2</b> | <b>0</b> | <b>4</b> | <b>1</b> | <b>0</b> | <b>1</b> | <b>12 +</b> |
| <b><i>J00-J99: Diseases of the circulatory system (6 studies /5 trials)</i></b> |                                                                                                  |          |          |          |          |           |          |          |          |          |          |          |             |
| (Pfaeffli et al., 2012)                                                         | Change in maximal oxygen uptake (VO2max) from baseline to 24 weeks.                              |          |          |          |          | ✓         | ✓        |          | ✓        |          |          |          | --          |
| (Antypas and Wangberg, 2014)                                                    | Duration and Intensity of Physical Activity                                                      |          |          |          | ✓        | ✓         |          |          |          |          |          |          | --          |
| (Stoddart et al., 2013)                                                         | Average daytime systolic blood pressure at 6 months measured by ambulatory monitoring.           |          |          |          |          | ✓         |          |          |          | ✓        |          |          | +           |
| (McKinstry et al., 2013)                                                        | »                                                                                                |          |          |          |          | »         |          |          |          |          |          |          | »           |
| (Fjeldsoe et al., 2012)                                                         | Moderate to vigorous physical activity                                                           |          |          |          |          | ✓         |          |          |          |          |          |          | --          |
| (Kizony et al., 2013)                                                           | Chedoke Arm and Hand Activity Inventory (CAHAI-7)                                                |          |          |          |          | ✓         |          |          |          |          |          |          | +           |
| <b>Total of this category</b>                                                   |                                                                                                  | <b>0</b> | <b>0</b> | <b>0</b> | <b>1</b> | <b>5</b>  | <b>1</b> | <b>0</b> | <b>1</b> | <b>1</b> | <b>0</b> | <b>0</b> | <b>2 +</b>  |
| <b><i>J00-J99: Diseases of the respiratory system (3 studies /2 trials)</i></b> |                                                                                                  |          |          |          |          |           |          |          |          |          |          |          |             |
| (Ryan et al., 2012)                                                             | Change in asthma control between baseline and six months as measured by ACQ                      |          |          |          |          | ✓         |          |          |          | ✓        |          |          | --          |
| (Malhotra et al., 2012)                                                         | »                                                                                                |          |          |          |          | »         |          |          |          |          |          |          | »           |
| (Meltzer, Kelley and Hovell, 2008)                                              | To determine subject preference of a traditional paper symptom diary vs. the VOCEL® Mobile Diary |          | ✓        |          | ✓        | ✓         |          | ✓        |          |          |          |          | --          |
| <b>Total of this category</b>                                                   |                                                                                                  | <b>0</b> | <b>1</b> | <b>0</b> | <b>1</b> | <b>1</b>  | <b>0</b> | <b>1</b> | <b>0</b> | <b>0</b> | <b>0</b> | <b>0</b> | <b>0</b>    |

| <b>Z00-Z99: Factors influencing health status and contact with health services (8 studies /7 trials)</b> |                                                                                                                                                                           |          |          |          |          |          |          |          |          |          |          |          |            |
|----------------------------------------------------------------------------------------------------------|---------------------------------------------------------------------------------------------------------------------------------------------------------------------------|----------|----------|----------|----------|----------|----------|----------|----------|----------|----------|----------|------------|
| (Suhling et al., 2014)                                                                                   | Improvement of percentage of calcineurin inhibitor trough levels (Delta %) in target range 6 months after patient education compared to 6 months before patient education |          | ✓        |          |          | ✓        |          |          |          | ✓        |          | ✓        | --         |
| (Turner-McGrievy and Tate, 2011)                                                                         | Weight loss                                                                                                                                                               |          |          |          |          | ✓        |          |          |          |          |          |          | --         |
| (Turner-McGrievy and Tate, 2013)                                                                         | >>                                                                                                                                                                        |          |          |          |          | >>       |          |          |          |          |          |          | >>         |
| (Short et al., 2014)                                                                                     | Physical Activity Questionnaire; Nutrition/Food Questionnaire; Physical Activity Literacy; Questionnaire; Nutrition Literacy Questionnaire                                |          |          |          | ✓        | ✓        |          |          |          |          |          |          | +          |
| (Batch et al., 2014)                                                                                     | Change in body weight                                                                                                                                                     |          |          |          |          | ✓        |          |          |          |          |          |          | +          |
| (Norman et al., 2013)                                                                                    | The Primary Outcome Will be the Effect of the mDIET System in Comparison to a Control Group on BMI Among Overweight Men and Women.                                        |          |          |          |          | ✓        |          |          |          |          |          |          | --         |
| (Albrecht et al., 2013)                                                                                  | Learning efficiency before and after the learning phase measured with a 10-item SC-test                                                                                   |          |          | ✓        |          |          |          |          |          |          | ✓        |          | +          |
| (King et al., 2013)                                                                                      | Community Healthy Activities Model Program for Seniors (CHAMPS) Questionnaire; steps per day measured by accelerometer                                                    | ✓        |          |          | ✓        | ✓        |          | ✓        |          |          | ✓        |          | +          |
| <b>Total of this category</b>                                                                            |                                                                                                                                                                           | <b>1</b> | <b>1</b> | <b>1</b> | <b>2</b> | <b>6</b> | <b>0</b> | <b>1</b> | <b>0</b> | <b>1</b> | <b>2</b> | <b>1</b> | <b>4 +</b> |

| <b>Other subjects (Older adults, Reproductive Health and Childbirth, Screening for Partner Violence) (4 studies /3 trials)</b> |                                                                                                                                                                                                           |              |              |              |              |              |              |              |              |              |              |              |                         |
|--------------------------------------------------------------------------------------------------------------------------------|-----------------------------------------------------------------------------------------------------------------------------------------------------------------------------------------------------------|--------------|--------------|--------------|--------------|--------------|--------------|--------------|--------------|--------------|--------------|--------------|-------------------------|
| (Ahmad et al., 2009)                                                                                                           | Discussion-opportunity about risk of partner abuse during physician-patient medical encounter (audiotaped data); Detection of partner abuse during physician-patient medical encounter (audio taped data) |              |              |              |              | √            |              | √            |              |              |              |              | +                       |
| (Terrell et al., 2009)                                                                                                         | Proportion of ED patients aged 65 and older who receive a potentially inappropriate medication                                                                                                            |              |              |              |              |              | √            |              |              |              |              |              | +                       |
| (Lund et al., 2014a)                                                                                                           | Skilled delivery attendance                                                                                                                                                                               |              | √            |              |              | √            |              |              |              |              |              |              | --                      |
| (Lund et al., 2014b)                                                                                                           | »                                                                                                                                                                                                         |              | »            |              |              | »            |              |              |              |              |              |              | »                       |
| <b>Total of this category</b>                                                                                                  |                                                                                                                                                                                                           | <b>0</b>     | <b>1</b>     | <b>0</b>     | <b>0</b>     | <b>2</b>     | <b>1</b>     | <b>1</b>     | <b>0</b>     | <b>0</b>     | <b>0</b>     | <b>0</b>     | <b>2 +</b>              |
|                                                                                                                                |                                                                                                                                                                                                           |              |              |              |              |              |              |              |              |              |              |              | <b>Total estimation</b> |
| <b>Number of trials that examined this impact</b>                                                                              |                                                                                                                                                                                                           | <b>7</b>     | <b>10</b>    | <b>3</b>     | <b>7</b>     | <b>45</b>    | <b>7</b>     | <b>6</b>     | <b>8</b>     | <b>6</b>     | <b>3</b>     | <b>5</b>     | <b>31 +</b>             |
| <b>Number wherein the examined impact contribute to positive outcome summary</b>                                               |                                                                                                                                                                                                           | <b>6</b>     | <b>5</b>     | <b>1</b>     | <b>4</b>     | <b>26</b>    | <b>4</b>     | <b>4</b>     | <b>6</b>     | <b>1</b>     | <b>2</b>     | <b>3</b>     |                         |
| <b>Rate wherein the examined impact contribute to positive outcome summary</b>                                                 |                                                                                                                                                                                                           | <b>85.7%</b> | <b>50.0%</b> | <b>33.3%</b> | <b>57.1%</b> | <b>57.8%</b> | <b>57.1%</b> | <b>66.7%</b> | <b>75.0%</b> | <b>16.7%</b> | <b>66.7%</b> | <b>60.0%</b> | <b>60.8%+</b>           |
